# Supplementary material for: Effect of willow herb (Epilobium angustifolium L.) extract addition to canned meat with reduced amount of nitrite on the antioxidant and other activities of peptides
Source: Royal Society of Chemistry journal article supplement (doi:10.1039/d1fo01534f), 2022-01-01
Supplement: d1fo01534f1.xlsx [file d1fo01534f1.xlsx]

## Sheet: Table 1. Profile of potential b
	Table 1. Profile of potential biological activity offered by peptides from canned pork present after 0 as wll as 180 days of storage
No.	Peptide	mass	amino acid	PeptideRanker1	DPP III - I	DPP IV-I	ACE-I	antioxidative	antiamnestic	stimulating	regulating	hypotensive	inhibitor	aqntitrombotic	bacterial permease ligant	activating ubiquitin-mediated proteolysis	immunomodulating	neuropeptide	anticancer	anorectic	chemotactic	opioid	alphaglucosidase inhibitor	antibacterial	CaMPDE inhibitor	hypolipidemic	renin inhibitor	alpha amylase inhibitor	pancreatic lipase inhibitor	hypolipidemic	anty inflammatory	immunostimulating
	PFGNTHN	785.346	7	0.356	0.14292	0.4286	0.1429
	RPPPGPPPP	910.502	9	0.908		1.1111	1.4444	0.1111	0.3333		0.3333		0.3333	0.3333							0.1111		0.5556
	PRVLLLDL	937.596	8	0.401	0.2500	0.3750	0.1250			0.5000
	PRPPPGPPPQ	1038.56	10	0.798	0.100	0.9000	1.3000	0.1000	0.3000		0.3000		0.3000	0.3000							0.1000		0.4000
	LMVHMASKE	1076.5	9	0.106	0.0435	0.3913	0.0870
	EAGPSIVHRK	1092.6	10	0.37		0.7000	0.4000		0.1000	0.1000	0.1000			0.1000									0.1000
	SPPRPPPGPPP	1094.59	11	0.908	0.0909	0.9091	1.1818	0.0909	0.2727		0.2727		0.3636	0.2727							0.0909		0.4545
	PGARPPPGPPPP	1135.61	12	0.81		1.0000	1.3333	0.0833	0.3333		0.3333		0.2500	0.3333							0.0833		0.4167
	VSTVLTSKYR	1152.65	10	0.09	0.1	0.8000	0.2000			0.1000								0.1000				0.1000		0.1000
	VLSAADKANVKA	1185.67	12	0.157	0.1	0.8000	0.3333			0.0833													0.0833
	SPPRPPPGPPPQ	1222.65	12	0.856	0.0833	0.9167	1.1667	0.0833	0.2500		0.2500		0.3333	0.2500									0.4167
	FGYEGDFYRA	1223.52	10	0.618	0.1	0.5000	0.9000									0.1000		0.1000
	EFLEFMKGVE	1227.58	10	0.224	0.2	0.5000	0.5000																0.1000		0.2000	0.2000	0.2000
	RPPPGPPPPPPGP	1258.68	13	0.945		1.3077	1.4615	0.0769	0.4615		0.4615		0.4615	0.4615							0.1538		0.5385
	GKVLPGVDALSNV	1267.71	13	0.228	0.0769	0.6154	0.6154		0.0769	0.0769	0.0769			0.0769
	PTNAEVKKVLGN	1268.71	12	0.161		0.7500	0.3333			0.0833					0.0833
	APPGARPPPGPPPP	1303.7	14	0.803		1.0714	1.2857	0.0714	0.2857		0.2857		0.2143	0.2857							0.0714		0.4286
	RSPFFDLEDAN	1309.59	11	0.33	0.1818	0.1818	0.0909
	MAAKYKELGFQG	1341.68	12	0.305	0.1667	0.6667	0.6667	0.0833
	FAGDDAPRAVFPS	1348.64	13	0.566	0.2308	0.6154	0.8462	0.0769								0.0769												0.0769	0.0769
	YEAFVKHIMSI	1352.68	12	0.281	0.0417	0.3750	0.2083																0.0417
	LVHIITHGEEKD	1389.73	12	0.053	0.0833	0.5833	0.2500	0.0833		0.2500
	PEDVITGAFKVLD	1402.73	13	0.255	0.0769	0.4615	0.2308			0.0769													0.0769
	YVPKLYEQLSGK	1423.77	12	0.181		0.4167	0.7500	0.0833																			0.0833
	PFGNTHNKYKLN	1431.73	12	0.5	0.1667	0.5000	0.5000
	DMAAKYKELGFQG	1456.7	13	0.361	0.1538	0.6154	0.6923	0.0769
	APPGARPPPGPPPPGP	1457.78	16	0.818		1.1250	1.2500	0.0625	0.4375		0.4375		0.3750	0.4375							0.1250		0.3750
	DMAAKYKELGFQG	1472.7	13	0.361	0.1154	0.3846	0.3846	0.0385
	SLKPEFVDIINAK	1472.82	13	0.372	0.0769	0.4615	0.1538	0.2308		0.0769													0.0769		0.0769		0.0769			0.0769
	PDLVLPVPAFNVIN	1506.84	14	0.631	0.7857	0.7857	0.2857			0.1429
	RPPPGPPPPGPPPPGP	1509.81	16	0.9		1.2500	1.4375	0.1250	0.5625		0.5625		0.5625	0.5625							0.1875		0.5000
	RVVDLMVHMASKE	1529.77	13	0.112	0.0769	0.4231	0.0769
	DYVPKLYEQLSGK	1538.8	13	0.234	0.3846	0.3846	0.7692	0.0769			0.0769																0.0769
	ARPPPGPPPPGPPPPGP	1580.85	17	0.886	1.1765	1.1765	1.4118	0.1176	0.5294		0.5294		0.5294	0.5294							0.1765		0.4706
	ELGISTPEELGLDKV	1598.84	15	0.159	0.0667	0.2667	0.4667	0.1333		0.0667													0.0667
	GASLKPEFVDIINAK	1600.88	15	0.501	0.0667	0.5333	0.2667	0.2000		0.0667													0.0667		0.0667	0.0667	0.0667
	APPGARPPPGPPPPPPGP	1651.88	18	0.848		1.2222	1.3333	0.0556	0.3889		0.3889		0.3333	0.3889							0.1111		0.4444
	APPGARPPPGPPPPGPPP	1651.88	18	0.809		1.1111	1.3333	0.1111	0.3889		0.3889		0.3333	0.3889							0.1111		0.4444
	GEVVSEATQQQHEVL	1652.8	15	0.059	0.0667	0.8000	0.3333			0.1333													0.0667
	TVRKAMEAVAAQGKAK	1657.93	16	0.095	0.125	0.6250	0.6250																0.0625
	NIPLEMELPGVKIVH	1687.93	15	0.286		0.6000	0.4667	0.0667	0.0667	0.0667	0.0667			0.0667
	NIPLEMELPGVKIVH	1703.93	16	0.286	0.0357	0.3929	0.2857	0.0357	0.0357	0.0357	0.0357			0.0357
	AISEELDNALNDITSL	1716.84	16	0.242		0.4375	0.1250	0.1250		0.1250
	PGARPPPGPPPPGPPPPGP	1734.92	19	0.874		1.1579	1.3684	0.1053	0.5263		0.5263		0.4737	0.5263							0.1579		0.4211
	VNVDYSKLKKEGPDF	1737.89	15	0.269		0.6000	0.4000	0.0667	0.0667		0.1333			0.0667	0.0667
	APPGARPPPGPPPPGPPPP	1748.94	19	0.801		1.1579	1.3684	0.1053	0.3684		0.3684		0.3158	0.3684							0.1053		0.4737
	VPPVQVSPLIKLGRYS	1752.03	16	0.369		0.6250	0.6250	0.0625		0.0625													0.0625								0.0625
	APPPPAEVHEVHEEVH	1772.85	16	0.36		0.9375	0.5625			0.0625			0.0625										0.1875
	PPDIEFAKKVTNQVSK	1799.98	16	0.354	0.0625	0.6250	0.1875								0.0625								0.0625		0.0625	0.0625	0.0625
	APPGARPPPGPPPPGPPPPG	1805.96	20	0.847		1.2000	1.3500	0.1000	0.4000		0.4000		0.3500	0.4000							0.1000		0.4500
	PPGARPPPGPPPPGPPPPGP	1831.97	20	0.86		1.2000	1.3500	0.1000	0.5000		0.5000		0.4500	0.5000							0.1500		0.4500
	VLSAADKANVKAAWGKVGG	1841.02	19	0.617	0.1053	0.6842	0.5789	0.1053		0.0526													0.0526
	APNIPLEMELPGVKIVH	1856.02	17	0.525		0.6471	0.4706	0.0588	0.0588	0.0588	0.0588			0.0588
	PEDVITGAFKVLDPEGKG	1870.97	18	0.381	0.1111	0.5000	0.3333			0.0556													0.1111
	APPGARPPPGPPPPGPPPPGP	1903.01	21	0.612		1.1905	1.3333	0.0952	0.4762		0.4762		0.4286	0.4762							0.1429		0.4286
	EETVRKAMEAVAAQGKAK	1916.01	18	0.121	0.1111	0.6111	0.5556			0.0556													0.0556
	EETVRKAMEAVAAQGKAK	1932.01	18	0.121	0.0968	0.4194	0.3548			0.0323													0.0323
	PRSPPNPENIAPGYSGPLK	1990.03	19	0.658	0.1053	0.6316	0.6842	0.0526	0.1053		0.1053			0.1053									0.1053
	FGPTGIGFGGLTHQVEKKE	2001.03	19	0.508	0.0526	0.7368	0.7368		0.0526		0.0526			0.0526	0.0526								0.0526
	FLVGGASLKPEFVDIINAK	2017.12	19	0.5	0.1053	0.6316	0.3158	0.1579		0.1053													0.0526		0.0526	0.0526	0.0526
	TVPLLEPHLDPEAAEQIR	2027.07	18	0.159	0.1111	0.7222	0.3889	0.1667	0.0556	0.1111													0.1111		0.0556		0.0556
	GFLVGGASLKPEFVDIINAK	2074.15	20	0.648	0.2	0.6500	0.3500	0.1500		0.1000	0.0500												0.0500		0.0500	0.0500	0.0500					0.0500
	APPGARPPPPPPPPADEPQQGP	2166.09	22	0.538		1.1364	1.0909		0.0909		0.0909		0.0455	0.0909									0.4091
	LSEIQNIKSELKYVPRAEQ	2244.21	19	0.106	0.0526	0.4737	0.3684	0.1053		0.1053						0.0526
	PEGEFQRLAAQSGLYESEEL	2252.06	20	0.271	0.15	0.5000	0.6000	0.1000		0.1000	0.0500					0.0500							0.0500		0.0500	0.0500	0.1000
	KVSHVSTGGGASLELLEGKVLPGVDALSNV	2932.59	30	0.15	0.0333	0.7000	0.5000	0.0333	0.0333	0.0667	0.0333			0.0333
	TEDKVSHVSTGGGASLELLEGKVLPGVDALSNV	3277.7	33	0.135		0.6667	0.4848	0.0303	0.0303	0.0606	0.0303			0.0303
	APPGARPPPGPPPPGPPPPGPAPPGARPPPGPPPPGP	3342.78	37	0.414		1.2162	1.3514	0.0811	0.4595		0.4595		0.4054	0.4595							0.1351		0.4054
	RPPPGPPPPGPPPPGPAPPGARPPPGPPPPGPPPPGP	3394.81	37	0.474		1.2703	1.4324	0.1081	0.5135		0.5135		0.4865	0.5135							0.1622		0.4595
	APPGARPPPGPPPPGPPPPGPAPPGARPPPGPPPPPPGP	3536.88	39	0.39		1.2564	1.3846	0.0769	0.4359		0.4359		0.3846	0.4359							0.1282		0.4359
	PGARPPPGPPPPGPPPPGPAPPGARPPPGPPPPGPPPPGP	3619.92	40	0.367		1.2250	1.4000	0.1000	0.5000		0.5000		0.4500	0.5000							0.1500		0.4250
	APPGARPPPGPPPPGPPPPGPAPPGARPPPGPPPPGPPPPGP	3788.01	42	0.395		1.2381	1.3810	0.0952	0.4762		0.4762		0.4286	0.4762							0.1429		0.4286
	PPGPAPPGARPPPGPPPPGPPPPGPAPPGARPPPGPPPPGPP	3788.01	42	0.38		1.2381	1.3571	0.0952	0.4762		0.4762		0.4048	0.4762							0.1429		0.4048
	PPGPAPPGARPPPGPPPPGPPPPGPAPPGARPPPGPPPPPPG	3788.01	42	0.371		1.2857	1.3810	0.0714	0.4286		0.4286		0.3571	0.4286							0.1190		0.4286
	1 - indicatol of potential bioactivity (tools available in PeptideRanker website ( http://distilldeep.ucd.ie/PeptideRanker/; access: February 2021)
	2 - number presented frequency of bioactive fragments occurrence in peptides sequence (A-parameter) (tools available in BIOPEP-UWM website (http://www.uwm.edu.pl/biochemia/index.php/pl/biopep; access: February 2021 )

## Sheet: Table 2. Selected physicochemic
	Table 2. Selected physicochemical properties of peptides from canned pork present after 0 as wll as 180 days of storage (data was collected using INNOVAGEN tools and PROTPARAM tools available in website : http://www.innovagen.com/ and https://web.expasy.org/protparam/; access: February 2021)
	Peptides	mass	solubility	net chatge	hydrophobicity (GRAVY)
	PFGNTHN	785.346	poor	0.1	-1.443
	PRVLLLDL	910.502	good	0	-1.789
	RPPPGPPPP	937.596	good	1	1.225
	LMVHMASKE	1038.56	good	0.1	-1.96
	PRPPPGPPPQ	1076.5	good	1	0.244
	EAGPSIVHRK	1092.6	good	1.1	-0.74
	VSTVLTSKYR	1094.59	good	2	-1.682
	FGYEGDFYRA	1135.61	good	-1	-1.358
	EFLEFMKGVE	1152.65	good	-2	-0.05
	SPPRPPPGPPP	1185.67	good	1	0.317
	RSPFFDLEDAN	1222.65	good	-2	-1.833
	PGARPPPGPPPP	1223.52	good	1	-0.75
	VLSAADKANVKA	1227.58	good	1	0.07
	SPPRPPPGPPPQ	1258.68	good	1	-1.638
	PTNAEVKKVLGN	1267.71	good	7	0.608
	MAAKYKELGFQG	1268.71	good	1	-0.583
	YEAFVKHIMSI	1303.7	poor	0.1	-1.15
	LVHIITHGEEKD	1309.59	good	-1.8	-0.882
	YVPKLYEQLSGK	1341.68	good	1	-0.4
	PFGNTHNKYKLN	1348.64	good	2.1	-0.054
	RPPPGPPPPPPGP	1352.68	good	1	0.636
	GKVLPGVDALSNV	1389.73	poor	0	-0.408
	FAGDDAPRAVFPS	1402.73	good	-1	0.323
	PEDVITGAFKVLD	1423.77	good	-2	-0.7
	DMAAKYKELGFQG	1431.73	good	0	-1.575
	DMAAKYKELGFQG	1456.7	good	0	-0.638
	SLKPEFVDIINAK	1457.78	good	0	-1.131
	RVVDLMVHMASKE	1472.7	good	0.1	-0.638
	DYVPKLYEQLSGK	1472.82	good	0	0.069
	APPGARPPPGPPPP	1506.84	good	1	1
	PDLVLPVPAFNVIN	1509.81	poor	-1	-1.556
	ELGISTPEELGLDKV	1529.77	good	-3	0.2
	GASLKPEFVDIINAK	1538.8	good	0	-0.915
	GEVVSEATQQQHEVL	1580.85	good	-2.9	-1.359
	NIPLEMELPGVKIVH	1598.84	poor	-0.9	-0.113
	VNVDYSKLKKEGPDF	1600.88	good	0	0.153
	APPGARPPPGPPPPGP	1651.88	good	1	-1.183
	RPPPGPPPPGPPPPGP	1651.88	good	1	-1.183
	TVRKAMEAVAAQGKAK	1652.8	good	3	-0.527
	NIPLEMELPGVKIVH	1657.93	poor	-0.9	-0.312
	AISEELDNALNDITSL	1687.93	good	-4	0.38
	VPPVQVSPLIKLGRYS	1703.93	poor	2	0.38
	APPPPAEVHEVHEEVH	1716.84	good	-3.7	0.044
	PPDIEFAKKVTNQVSK	1734.92	good	1	-1.321
	ARPPPGPPPPGPPPPGP	1737.89	good	1	-0.987
	APNIPLEMELPGVKIVH	1748.94	good	-0.9	-1.205
	APPGARPPPGPPPPPPGP	1752.03	good	1	0.294
	APPGARPPPGPPPPGPPP	1772.85	good	1	-0.863
	PEDVITGAFKVLDPEGKG	1799.98	good	-2	-0.806
	EETVRKAMEAVAAQGKAK	1805.96	good	1	-1.165
	EETVRKAMEAVAAQGKAK	1831.97	good	1	-1.335
	TVPLLEPHLDPEAAEQIR	1841.02	good	-2.9	0.2
	PGARPPPGPPPPGPPPPGP	1856.02	good	1	0.347
	APPGARPPPGPPPPGPPPP	1870.97	good	1	-0.311
	VLSAADKANVKAAWGKVGG	1903.01	good	2	-1.186
	PRSPPNPENIAPGYSGPLK	1916.01	good	1	-0.667
	FGPTGIGFGGLTHQVEKKE	1932.01	good	0.1	-0.667
	FLVGGASLKPEFVDIINAK	1990.03	poor	0	-1.163
	LSEIQNIKSELKYVPRAEQ	2001.03	good	0	-0.442
	APPGARPPPGPPPPGPPPPG	2017.12	good	1	0.668
	PPGARPPPGPPPPGPPPPGP	2027.07	good	1	-0.389
	GFLVGGASLKPEFVDIINAK	2074.15	poor	0	0.615
	PEGEFQRLAAQSGLYESEEL	2166.09	good	-4	-1.505
	APPGARPPPGPPPPGPPPPGP	2244.21	good	1	-0.8
	APPGARPPPPPPPPADEPQQGP	2252.06	good	-1	-0.825
	KVSHVSTGGGASLELLEGKVLPGVDALSNV	2932.59	poor	-0.9	0.37
	TEDKVSHVSTGGGASLELLEGKVLPGVDALSNV	3277.7	good	-2.9	0.103
	APPGARPPPGPPPPGPPPPGPAPPGARPPPGPPPPGP	3342.78	good	2	-1.162
	RPPPGPPPPGPPPPGPAPPGARPPPGPPPPGPPPPGP	3394.81	good	2	-1.346
	APPGARPPPGPPPPGPPPPGPAPPGARPPPGPPPPPPGP	3536.88	good	2	-1.185
	PGARPPPGPPPPGPPPPGPAPPGARPPPGPPPPGPPPPGP	3619.92	good	2	-1.25
	APPGARPPPGPPPPGPPPPGPAPPGARPPPGPPPPGPPPPGP	3788.01	good	2	-1.186
	PPGPAPPGARPPPGPPPPGPPPPGPAPPGARPPPGPPPPGPP	3788.01	good	2	-1.186
	PPGPAPPGARPPPGPPPPGPPPPGPAPPGARPPPGPPPPPPG	3788.01	good	2	-1.186

## Sheet: Fig,Total number of amino acids
	Fig. Total number of amino acids present in peptide sequences from canned pork
