# Supplementary material for: Effect of willow herb (Epilobium angustifolium L.) extract addition to canned meat with reduced amount of nitrite on the antioxidant and other activities of peptides
Source: Royal Society of Chemistry journal article supplement (doi:10.1039/d1fo01534f), 2022-01-01
Supplement: d1fo01534f2.xlsx [file d1fo01534f2.xlsx]

## Sheet: Table 1. Profile of potential b
Table 1. Profile of potential biological activity offered by peptides common from W_C, W_015 and W_1 batches after 0 as wll as 180 days of storage
	No.	Peptide	mass	amino acid	PeptideRanker1	DPP III - I	DPP IV-I	ACE-I	antioxidative	antiamnestic	stimulating	regulating	hypotensive	inhibitor	aqntitrombotic	bacterial permease ligant	activating ubiquitin-mediated proteolysis	immunomodulating	neuropeptide	anticancer	anorectic	chemotactic	opioid	alphaglucosidase inhibitor	antibacterial	CaMPDE inhibitor	hypolipidemic	renin inhibitor	alpha amylase inhibitor	pancreatic lipase inhibitor	hypolipidemic	anty inflammatory	immunostimulating
after 0 days	1	PSNEEMNAKKIEFEQFLPMLQAISNN	3021.46	26	0.246	0,03852 2	0.5	0.1923	0.0385		0.0385					0.0385										0.0385	0.0385	0.0769			0.0385
	2	AIDEGWMYGTVQRTGRTGMLPANYVEAI	3098.5		0.1458	0.0714	0.5357	0.5714	0.0714									0.0357						0.0714
	3	PIISGLYQGAGGPGAGGFGAQAPKGGSGSGPTIEE	3141.54		0.2863	0.0286	0.6857	0.7714	0.0571	0.0857	0.0571	0.1143			0.0857													0.0286
	4	PGARPPPGPPPPGPPPPGPAPPGARPPPGPPPPGP	3174.69		0.3939		1.2	1.3714	0.0857	0.4857		0.4857		0.4286	0.4857									0.4
	5	DPIGNLNTAFEVAEKYLDIPKMLDAEDIVN	3346.66		0.0216	0.0667	0.6	0.2667	0.0333		0.0333								0.0333
	6	PGARPPPGPPPPGPPPPGPAPPGARPPPGPPPPPPGP	3368.79		0.3734		1.2432	1.4054	0.0811	0.4595		0.4595		0.4054								0.1351		0.4324
	7	DFGADAQGAMSKALELFRNDMAAKYKELGFQG	3478.66		0.316	0.1562	0.5625	0.625	0.0625															0.0312
	8	FVEQEEGESKAFEPWEDIQENFLYYEEKLADILK	4164.97		0.0451	0.1471	0.6176	0.4118	0.1765		0.0882						0.0294							0.0588				0.0294
	9	LSNRPSFNRTPIPWLSSGEPVDYNVDIGIPLDGETEEL	4226.08		0.083	0.0526	0.6316	0.4471	0.0789		0.0263	0.0263			0.0263													0.0789
	10	SKTIVAINKDPEAPIFQVADYGIVADLFKVVPEMTEILKKK	4557.52		0.0018	0.0732	0.5854	0.3659	0.0488		0.0732	0.0244				0.0732		0.0244						0.122
	11	SKTIVAINKDPEAPIFQVADYGIVADLFKVVPEMTELLKKK	4557.52		0.002	0.0732	0.561	0.3171	0.0732		0.0732	0.0244				0.0732		0.0244						0.122
	12	PPGPAPPGARPPPGPPPPGPPPPGPAPPGARPPPGPPPPGPPPPGPAPPGARPPPGPP	5227.78		0.3311		1.2414	1.3621	0.0862	0.4655		0.4655		0.3966	0.4655							0.1379		0.3966
	13	PPGPAPPGARPPPGPPPPGPPPPGPAPPGARPPPGPPPPGPPPPGPAPPGARPPPPPPPPAD	5647.98		0.31		1.2903	1.371	0.0645	0.3871		0.3871		0.3387	0.3871							0.1129		0.4516
after 180 days	1	SKEYFSKHN	1138.54		0.2726	0.1111	0.6667	0.222
	2	DSKEYFSKHN	1253.57		0.2716	0.1	0.6	0.2
	3	SREVHTKIISEE	1426.74		0.0524		0.5	0.0833			0.25
	4	KAKDIEHAKKVSQQVSKV	2022.16		0.1879	0.0556	0.6111	0.1667	0.0556							0.0556
	5	VLSAADKANVKAAWGKVGGQAG	2097.13		0.7822	0.0909	0.0909	0.5909	0.0909		0.0455								0.0455					0.0455
	6	GEAAPYLRKSEKERIEAQN	2188.12		0.1694	0.1579	0.5789	0.5789			0.0526								0.0526					0.1053				0.0526				0.0526
	7	NEFGYSNRVVDLMVHMASKE + 2 Oxidation (M)	2357.08		0.1417	0.05	0.65	0.2																		0.05	0.05	0.1
	8	GGGASLELLEGKVLPGVDALSNV	2194.18		0.4911	0.0435	0.6522	0.5652	0.0435	0.0435	0.087	0.0435			0.0435
	9	PLNETVVDLYKKSSLKLLSN	2260.27		0.2088	0.05	0.6	0.3	0.1		0.05					0.05												0.05
	10	LVKAGFAGDD	991.497		0.1959	0.3	0.7	0.7			0.1																	0.1538
	11	LEDELYAQKLKYK	1639.88		0.1656	0.0769	0.2308	0.4615	0.2308
	12	PEDVITGAFKVLDPEGKGT	1972.02		0.3769	0.1053	0.4737	0.3684			0.0526													0.1053
	13	AKLKEIVTNFLAGFEA	1749.97		0.1984	0.1875	0.5625	0.5	0.0625		0.0625						0.0625							0.0625
	14	AMKAYINKVEELKKKYGI + Oxidation (M)	2141.19		0.306	0.1667	0.6667	0.4444	0.2222		0.0556							0.0556						0.0556
	15	VLSAADKANVKAAWGKVGGQAGAH	2305.23		0.5935	0.0833	0.7083	0.625	0.1667		0.0417								0.0417							0.0417
		1 - indicatol of potential bioactivity (tools available in PeptideRanker website (http://distilldeep.ucd.ie/PeptideRanker/ ; access: April 2021)
		2 - number presented frequency of bioactive fragments occurrence in peptides sequence (A-parameter) (tools available in website BIOPEP-UWM website ( http://www.uwm.edu.pl/biochemia/index.php/pl/biopep; access: April 2021))

## Sheet: Table 2. Selected physicohemic
Table 2. Selected phisycochemical properties of peptides common from W_C, W_015 and W_1 batches after 0 as wll as 180 days of storage (data was collected using INNOVAGEN tools available in website)
	No.	Peptides	Mass	solubility	net chatge	hydrophobicity
after 0 days	1	PSNEEMNAKKIEFEQFLPMLQAISNN	3021.46	good	-2	-0.692
	2	AIDEGWMYGTVQRTGRTGMLPANYVEAI	3098.5	poor	-1	-0.175
	3	PIISGLYQGAGGPGAGGFGAQAPKGGSGSGPTIEE	3141.54	poor	-1	-0.177
	4	PGARPPPGPPPPGPPPPGPAPPGARPPPGPPPPGP	3174.69	good	2	-1.234
	5	DPIGNLNTAFEVAEKYLDIPKMLDAEDIVN	3346.66	good	-5	-0.167
	6	PGARPPPGPPPPGPPPPGPAPPGARPPPGPPPPPPGP	3368.79	good	2	-1.254
	7	DFGADAQGAMSKALELFRNDMAAKYKELGFQG	3478.66	good	-1	-0.422
	8	FVEQEEGESKAFEPWEDIQENFLYYEEKLADILK	4164.97	good	-8	-0.894
	9	LSNRPSFNRTPIPWLSSGEPVDYNVDIGIPLDGETEEL	4226.08	good	-5	-0.529
	10	SKTIVAINKDPEAPIFQVADYGIVADLFKVVPEMTEILKKK	4557.52	good	0	0.139
	11	SKTIVAINKDPEAPIFQVADYGIVADLFKVVPEMTELLKKK	4557.52	good	0	0.122
	12	PPGPAPPGARPPPGPPPPGPPPPGPAPPGARPPPGPPPPGPPPPGPAPPGARPPPGPP	5227.78	good	3	-1.171
	13	PPGPAPPGARPPPGPPPPGPPPPGPAPPGARPPPGPPPPGPPPPGPAPPGARPPPPPPPPAD	5647.98	good	2	-1.194
after 180 days	1	SKEYFSKHN	1138.54	good	1.1	-2.011
	2	DSKEYFSKHN	1253.57	good	0.1	-2.16
	3	SREVHTKIISEE	1426.74	good	-0.9	-0.933
	4	KAKDIEHAKKVSQQVSKV	2022.16	good	3.1	-0.978
	5	VLSAADKANVKAAWGKVGGQAG	2097.13	good	2	0.077
	6	GEAAPYLRKSEKERIEAQN	2188.12	good	0	-1.484
	7	NEFGYSNRVVDLMVHMASKE + 2 Oxidation (M)	2357.08	good	-0.9	-0.38
	8	GGGASLELLEGKVLPGVDALSNV	2194.18	good	-2	0.526
	9	PLNETVVDLYKKSSLKLLSN	2260.27	good	1	-0.215
	10	LVKAGFAGDD	991.497	good	-1	0.27
	11	LEDELYAQKLKYK	1639.88	good	0	-1.162
	12	PEDVITGAFKVLDPEGKGT	1972.02	good	-2	-0.332
	13	AKLKEIVTNFLAGFEA	1749.97	good	0	0.494
	14	AMKAYINKVEELKKKYGI + Oxidation (M)	2141.19	good	3	-0.583
	15	VLSAADKANVKAAWGKVGGQAGAH	2305.23	good	2.1	0.013

## Sheet: Fig.1 and Fig. 2 Total number
	Fig. 1. Total number of amino acids present in peptides common from W_C, W_015 and W_1 batches after 0 days of storage
	Fig. 2. Total number of amino acids present in peptide sequences common from W_C, W_015 and W_1 batches after 180 days of storage
