# Supplementary material for: Effect of willow herb (Epilobium angustifolium L.) extract addition to canned meat with reduced amount of nitrite on the antioxidant and other activities of peptides
Source: Royal Society of Chemistry journal article supplement (doi:10.1039/d1fo01534f), 2022-01-01
Supplement: d1fo01534f3.xlsx [file d1fo01534f3.xlsx]

## Sheet: Table 1. Profile of potential b
		Table 1. Profile of potential biological activity offered by peptides from canned pork in W_015 and W_1 batches after 0 as wll as 180 days of storage
	No.	Peptide	mass	amino acid	PeptideRanker1	DPP III - I	DPP IV-I	ACE-I	antioxidative	antiamnestic	stimulating	regulating	hypotensive	inhibitor	aqntitrombotic	bacterial permease ligant	activating ubiquitin-mediated proteolysis	immunomodulating	neuropeptide	anticancer	anorectic	chemotactic	opioid	alphaglucosidase inhibitor	antibacterial	CaMPDE inhibitor	hypolipidemic	renin inhibitor	alpha amylase inhibitor	pancreatic lipase inhibitor	hypolipidemic	anty inflammatory	immunostimulating
after 0 days	1	LVKAGFAGDD	49.78	10	0.1959	0,3 2	0.7	0.7			0.1
	2	PGSAKTILNN	61.45	10	0.3633		0.6	0.4		0.1	0.1	0.1			0.1
	3	PEETILNAF	61.5	9	0.281	0.111	0.6667	0.3333			0.2222													0.1111
	4	HIITHGEEKD	58.72	10	0.0468	0.1	0.5	0.3	0.1		0.2
	5	EVHTKIISEE	54.49	10	0.0383		0.6	0.1			0.3
	6	EESYVVFKDLFD	41.19	12	0.2131		0.4567	0.5	0.0833		0.0833														0.0769
		PNYVLSSRVRTGR	37.84	13	0.2543	0.0769	0.4615	0.4615	0.0469		0.0769
		LLEGKVLPGVDALSNV	49.02	16	0.2241	0.0625	0.625	0.5625		0.0625	0.125	0.0625			0.0625
		LLEPHLDPEAAEQIR	56.53	15	0.2196	0.1333	0.6	0.333	0.2		0.0667													0.1333		0.0667		0.0667
		SYVGDEAQSKRGILTL	68.22	16	0.268		0.6875	0.5625	0.0625															0.0625
		IKHDPSLLPWTASYD	29.41	15	0.2923		0.8667	0.1333	0.1333		0.0667
		PSLLPWTASYDPGSAKT	70.39	17	0.2923		0.7647	0.2353	0.1176	0.0588	0.0588	0.0588			0.0588
		ILAADESTGSIAKRLQSIG	58.28	19	0.1875	0.0526	0.6313	0.6842			0.0526						0.0526							0.0526
		APPGARPPPGPPPPGPPPPGPA	37.69	22	0.5688		1.2273	1.3182	0.0909	0.4545		0.4545		0.4091	0.4545							0.1364		0.4091
		LFRNDMAAKYKELGFQG	37.98	17	0.2622	0.1765	0.6471	0.7059	0.0588
		SSDQEMAIFGEAAPYLRK	49.33	18	0.5805	0.1667	0.5	0.5556											0.0556					0.0556				0.0556				0.0556
		GSGLVKAGFAGDDAPRAVFPS	103.8	21	0.2708	0.2381	0.6667	0.9048	0.0476		0.0476						0.0476												0.0476	0.0476
		KETPSGFTLDDVIQTGVDN	49.37	19	0.7738	0.0526	0.6842	0.3158																				0.0526
		DLELTLAKVEKEKHATEN	57.19	18	0.1213	0.0556	0.667	0.3333	0.0556								0.0556							0.0556
		IVAPGKGILAADESTGSIAKRL	84.69	22	0.1196	0.0455	0.7273	0.7727		0.455	0.0909	0.0455					0.0455
		IVAPGKGILAADESTGSIAKRLQ	67.01	23	0.8238	0.0435	0.6957	0.7826			0.087	0.0435			0.0435		0.0435							0.0435
		VKQAFNPEGEFQRLAAQSGLYESEEL	26.25	26	0.1239	0.1154	0.5769	0.5769	0.0769		0.0769	0.0385					0.0385							0.0385		0.0385	0.0385	0.076
after 180 days		PGSAKTILN	899.508	9	0.4031		0.5556	0.4444		0.1111	0.1111	0.1111			0.11111
		GRIVKASFK	1004.61	9	0.23	0.1111	0.5556	0.4444			0.1111																	0.1111
		SGLVKAGFAGD	1020.52	11	0.3299	0.2727	0.7273	0.8182			0.0909
		PLDRAIAELA	1067.6	10	0.2248	0.1	0.6	0.7	0.1								0.2
		PLDRALAELA	1067.6	10	0.2644	0.2	0.7	0.5	0.1								0.3
		PVDLGKWSGPL	1167.63	11	0.7648		0.5455	0.7273		0.0909		0.0909			0.0909
		VLSAADKANVKAA	1256.71	13	0.1696	0.6154	0.1538	0.3846			0.0769													0.0769
		ALAHALQSARHD	1288.66	12	0.1756	0.0833	0.6667	0.3333	0.1667								0.0833
		YEAFVKHIMAS + Oxidation (M)	1310.63	27	0.2282		0.7273	0.3636																0.0909
		YEAFLKHILSV	1318.73	11	0.2149	0.0909	0.6364	0.4545	0.0909		0.0909													0.0909
		GGTEAGKSEKPGTK	1345.68	14	0.1819		0.0714	0.7143	0.0714	0.0714	0.0714	0.0714			0.0714									0.0714
		SGDKPKKKPPPPA	1345.77	13	0.6389		0.7692	0.6923	0.1538							0.2308								0.2308
		RPPPGPPPPGPPPP	1355.74	14	0.8654		1.2143	1.5	0.1429	0.4286		0.4286		0.4286	0.4286							0.1429		0.5714
		VGYLAHAIHQVTK	1435.79	13	0.2112	0.2308	0.7692	0.3846	0.0769								0.0769		0.0769
		PTTKTYFPHFNL	1464.74	12	0.3276	0.1667	0.9167	0.25	0.1667
		PALEAFGNAKTVRN	1486.79	14	0.4556		0.5714	0.2857																0.0714
		APRAVFPSIVGRPR	1521.89	14	0.676	0.1429	0.6429	0.9286			0.0714						0.0714
		KVVAGVANALAHKYH	1576.88	15	0.2279	0.2	0.8	0.4667	0.1333								0.0667
		ASIKKGEEFVKNMK	1607.87	14	0.4562	0.0714	0.5714	0.2857	0.0714		0.1429					0.0714										0.0714	0.0714	0.0714
		PFGNTHNKYKLNFK	1706.89	14	0.5786	0.1429	0.5	0.5714
		PSRHITGEKLGELYK	1726.94	15	0.2046	0.2	0.5333	0.5333	0.2																			0.0667
		PLLEAFGNAKTVRNDN	1757.91	16	0.2287		0.625	0.3125			0.0625													0.0625
		KSGVTVQVWKPSVVEE	1770.95	16	0.1284		0.125	0.375	0.125		0.0625								0.0625					0.125
		PFPAVFGDFLGRERLG	1776.93	16	0.8662	0.125	0.4375	0.75
		IPLEMELPGVKIVHAQF	1920.05	17	0.4014		0.6471	0.4118	0.0588	0.0588	0.0588	0.0588			0.0588													0.0588
		GRIDYDEFLEFMKGVE + Oxidation (M)	1962.9	32	0.2822	0.125	0.4375	0.5625				0.0625												0.0625		0.125	0.125	0.125
		LDTSEHAHLEHITRKRSG	2086.07	18	0.1377	0.0556	0.5556	0.2222	0.1667		0.0556
		SSTNGLINFIKQEREARSQ	2177.12	19	0.1517		0.3684	0.3684			0.0526													0.0526
		GNLDYKNLVHIITHGEEKD	2194.1	19	0.1309	0.1053	0.5263	0.3158	0.1579		0.1579	0.0526
		EFGYSNRVVDLMVHMASKE + Oxidation (M)	2227.04	35	0.1529	0.0526	0.6316	0.2105																		0.0526	0.0526	0.1053
		PSRHITGEKLGELYKSFIKN	2316.26	20	0.4939	0.15	0.5	0.45	0.15																			0.1
		DYGIVADLFKVVPEMTEILKKK	2535.4	22	0.0507	0.0909	0.5455	0.3636	0.0455		0.0909	0.0455				0.1364		0.0455						0.0909
		DYGIVADLFKVVPEMTELLKKK	2535.4	22	0.0542	0.0909	0.5	0.2727	0.0909		0.0909	0.0455				0.1364		0.0455						0.0909
		EGGFAPNILENNEALELLKTAIQAA	2625.36	25	0.1011	0.08	0.64	0.36	0.08		0.08													0.04
		GSSPVTSHDSSTNGLINFIKQEREARSQ	3044.49	28	0.3097		0.4643	0.2857			0.0357													0.0357
		PIGNLNTAFEVAEKYLDIPKMLDAEDIVN	3231.64	29	0.0113	0.069	0.5862	0.2759	0.0345		0.0345								0.0345
		DEIAPQIKAGKRVLIA	1721.02	16	0.4162	0.125	0.6875	0.625			0.125
		PEETILNAFKVFDPEG	1804.89	16	0.3016	0.125	0.625	0.3125			0.125													0.125
		DLPGALSALSDLHAHKLRVD	2127.14	20	0.4729	0.15	0.45	0.4	0.25	0.05		0.05																0.05
		VGKKAEAVATVVAAVDQARVR	2137.23	21	0.109	0.0952	0.7619	0.5238								0.0476								0.0476
		GSGLVKAGFAG	962.519	11	0.5684	0.2727	0.7273	0.8182			0.0909
		PLDRAIAEL	996.56	9	0.2315		0.5556	0.6667	0.1111								0.1111
		PLDRALAEL	996.56	9	0.2748	0.1111	0.6667	0.4444	0.1111								0.2222
		RVREPVISAVEQTAQR	1838.01	16	0.0849	0.0625	0.5	0.25																0.0625
		RVAPEEHPTLLTEAPLN	1885.99	17	0.1395	0.1765	0.7647	0.5882			0.1176													0.1176
		PGSAKTILNN	1013.55	10	0.3633		0.6	0.4			0.1	0.1			0.1
		PTNAEVLRVL	1110.64	10	0.2182	0.2	0.7	0.3			0.2																	0.1
		GQVITIGNERFR	1388.75	12	0.3195	0.1667	0.4167	0.4167											0.0833
		PNYVLSSRVRTGR	1503.83	13	0.2543	0.0769	0.4615	0.4615	0.0769		0.0769														0.0769
		IAHRIVAPGKGILAAD	1600.94	16	0.2206	0.0625	0.875	0.75	0.0625	0.0625	0.125	0.0625			0.0625		0.0625							0.0625
		SYVGDEAQSKRGILTL	1735.91	16	0.2679		0.6875	0.5625	0.0625		0.0625													0.0625
		LGIGKISPFEEKMIAE	1760.94	16	0.3668	0.0625	0.5	0.5			0.0625
		DLELTLAKVEKEKHATEN	2067.08	18	0.1213	0.0556	0.6667	0.3333	0.0556								0.0556							0.0556
		VLRALGTNPTNAEVKKVLGN	2093.2	20	0.1487	0.05	0.7	0.45			0.1					0.05	0.05											0.05
		NRVVDLMVHMASKE + Oxidation (M)	1643.81	30	0.1215	0.0714	0.7143	0.0714																				0.0714
		GYSNRVVDLMVHMASKE + Oxidation (M)	1950.93	33	0.1319	0.0588	0.7059	0.1176																				0.0588
		LELTLAKVEKEKHATEN	1952.06	17	0.0784	0.0588	0.7059	0.3529	0.0588								0.0588							0.0588
		KLKYKAISEELDHALNDMTSI	2418.25	21	0.0227	0.0952	0.4286	0.3333	0.1429		0.0952
		AQEKLELAEKKATD	1572.84	14	0.1111	0.1429	0.6429	0.3571	0.0714							0.6429	0.0714
		LKAAQEEYVKRALAN	1702.94	15	0.145	0.1333	0.6667	0.6	0.0667		0.0667						0.1333
		DYKNLVHIITHGEEKD	1909.95	16	0.0664	0.125	0.5625	0.3125	0.125		0.1875	0.0625
		RVVDLMVHMA + Oxidation (M)	1185.6	26	0.2822	0.1	0.6
		EKPKAGPAKSVFG	1314.73	13	0.566	0.0769	0.8462	0.6923	0.0769	0.0769		0.0769
		NEALELLKTAIQAA	1483.82	14	0.1059		0.5714	0.2143	0.1429		0.0714													0.0714
		PIIQDRHGGYKPTD	1595.81	14	0.2269	0.0714	0.8571	0.5714	0.1429		0.0714								0.0714
		APARKFFVGGNWKMN + Oxidation (M)	1737.88	31	0.9125		0.6	0.3333																		0.0667		0.0667
		ELFRNDMAAKYKELGFQG + Oxidation (M)	2132.04	34	0.2227	0.1667	0.6111	0.6667	0.1111
		ALELFRNDMAAKYKELGFQG + Oxidation (M)	2316.16	36	0.3144	0.15	0.6	0.6	0.1
		KLKYKAISEELDHALNDMTSI + Oxidation (M)	2434.24	37	0.0227	0.0952	0.4286	0,333300,1429			0.0952
		SKEYFSKHN	1138.54	9	0.2726	0.1111	0.6667	0.2222
		DSKEYFSKHN	1253.57	10	0.2716	0.1	0.6	0.2
		SREVHTKIISEE	1426.74	12	0.0524		0.5	0.0833			0.25
		KAKDIEHAKKVSQQVSKV	2022.16	18	0.1879	0.0556	0.6111	0.1667	0.0556							0.0556
		VLSAADKANVKAAWGKVGGQAG	2097.13	22	0.7822	0.0909	0.6818	0.5909	0.0909		0.0455								0.0455					0.0455
		GEAAPYLRKSEKERIEAQN	2188.12	19	0.1694	0.1579	0.5789	0.5789			0.0526								0.0526					0.1053				0.0526				0.0526
		NEFGYSNRVVDLMVHMASKE + 2 Oxidation (M)	2357.08	38	0.1417	0.05	0.65	0.2																		0.05	0.05	0.1
		GGGASLELLEGKVLPGVDALSNV	2194.18	23	0.4911	0.0435	0.6522	0.5652	0.0435	0.0435	0.087	0.0435			0.0435
		PLNETVVDLYKKSSLKLLSN	2260.27	20	0.2088	0.05	0.6	0.3	0.1		0.05					0.05												0.05
		LVKAGFAGDD	991.497	10	0.1959	0.3	0.7	0.7			0.1
		LEDELYAQKLKYK	1639.88	13	0.1956	0.0769	0.2308	0.4615	0.2308																			0.1538
		PEDVITGAFKVLDPEGKGT	1972.02	19	0.3769	0.1053	0.4737	0.3684			0.0526													0.1053
		AKLKEIVTNFLAGFEA	1749.97	16	0.306	0.1875	0.5625	0.5	0.0625		0.0625						0.0625							0.0625
		AMKAYINKVEELKKKYGI + Oxidation (M)	2141.19	34	0.306	0.1667	0.6667	0.4444	0.222		0.0556					0.1667		0.0556						0.0556					0.0556
		VLSAADKANVKAAWGKVGGQAGAH	2305.23	24	0.5935	0.0833	0.7083	0.625	0.1667		0.0417								0.0417					0.0417		0.0417
			1 - indicatol of potential bioactivity (tools available in PeptideRanker website (http://distilldeep.ucd.ie/PeptideRanker/ ; access: February 2021)
			2 - number presented frequency of bioactive fragments occurrence in peptides sequence (A-parameter) (tools available in website BIOPEP-UWM website ( http://www.uwm.edu.pl/biochemia/index.php/pl/biopep; access: February 2021))

## Sheet: Fig. 1.  Total number of amino 
	Fig. 1. Total number of amino acids present in peptides common from W_015 and W_1 batches after 0 days of storage
	Fig. 1. Total number of amino acids present in peptides common from W_015 and W_1 batches after 180 days of storage
